# Supplementary material for: Low-cost synthesis of graphitic carbon nanofibers as excellent room temperature sensors for explosive gases
Source: Royal Society of Chemistry journal article supplement (doi:10.1039/c2jm32031b), 2012-01-01
Supplement: c2jm32031b.pdf [file c2jm32031b.pdf]

## Supporting Information for:

# Low-cost synthesis of graphitic carbon nanofibers as excellent room temperature sensors for explosive gases

Wei Li,<sup>a,b</sup> Le-Sheng Zhang,<sup>a,b</sup> Qiong Wang,<sup>a</sup> Yu Yu,<sup>a,b</sup> Zhe Chen,<sup>a,b</sup> Chang-Yan Cao,<sup>a</sup> and Wei-Guo Song\*<sup>a</sup>

<sup>a</sup> Beijing National Laboratory for Molecular Sciences (BNLMS), Institute of Chemistry, Chinese Academy of Sciences, Beijing, 100190, P. R. China. Fax: +86 10-62567908; Tel: +86 10-62567908; E-mail: wsong@iccas.ac.cn

<sup>b</sup> Graduate University of Chinese Academy of Sciences, Beijing, 100049, P. R. China.

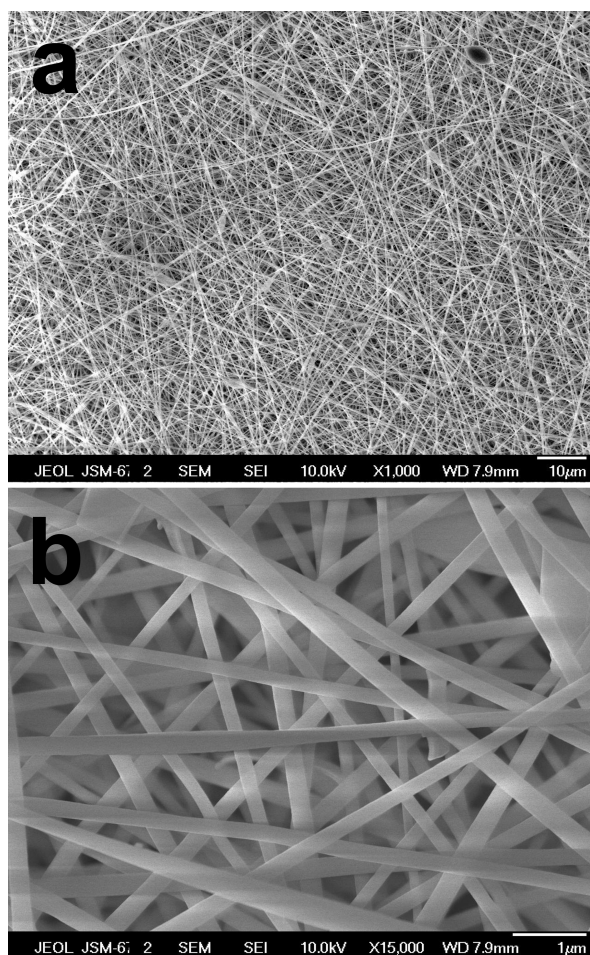

**Fig. S1** a) Low magnitude SEM image of electrospun Fe(acac)<sub>3</sub>/PAN composite nanofibers; b) SEM image of electrospun Fe(acac)<sub>3</sub>/PAN composite nanofibers with higher magnification.

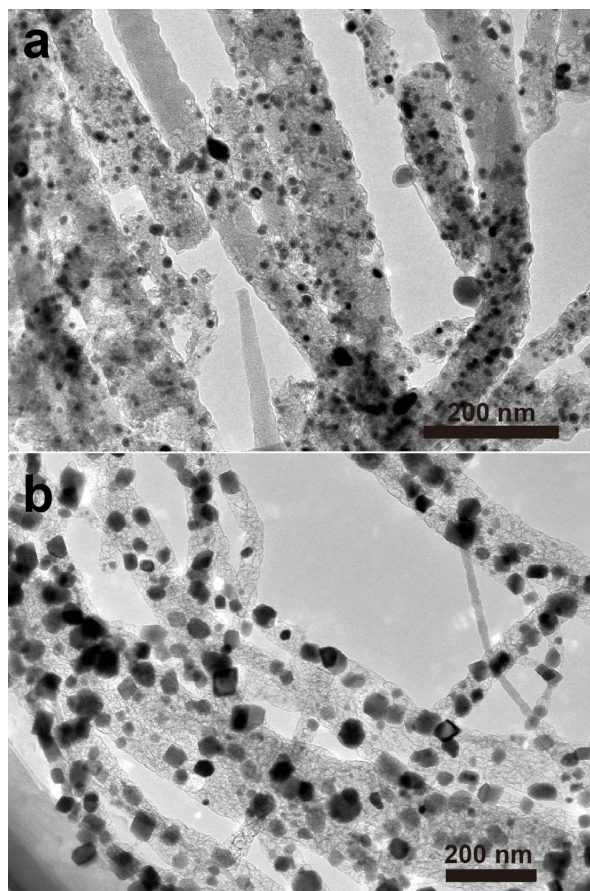

**Fig. S2** TEM image of (a) CNF-800 and (b) CNF-1000 without the removal of Fe nanoparticles

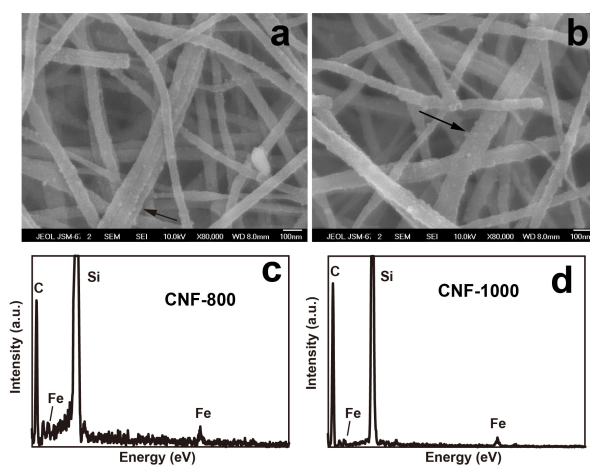

**Fig. S3** Higher magnification SEM image of (a) sample CNF-800 and (b) CNF-1000 with iron nanoparticles embedded in and EDX spectra of (c) sample CNF-800 and (d) CNF-1000; the Si peak arises from the silicon slice.

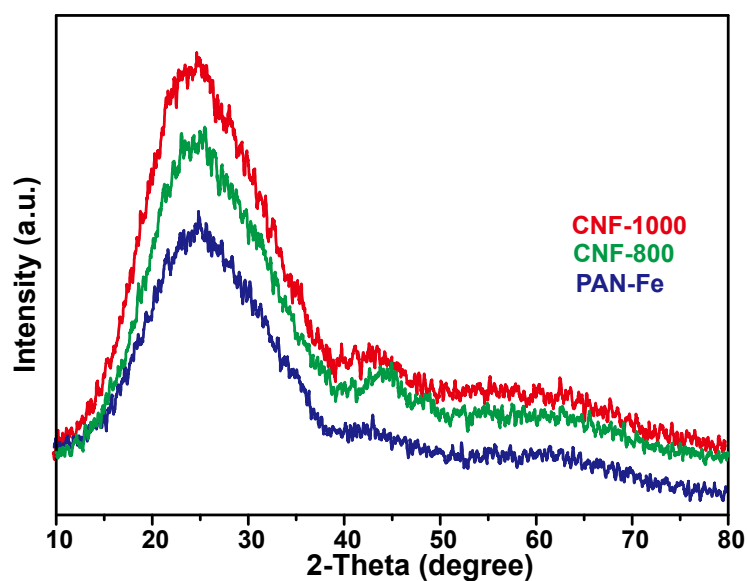

**Fig. S4** XRD patterns of  $\text{Fe}(\text{acac})_3/\text{PAN}$  composite nanofibers, CNF-800 and CNF-1000.

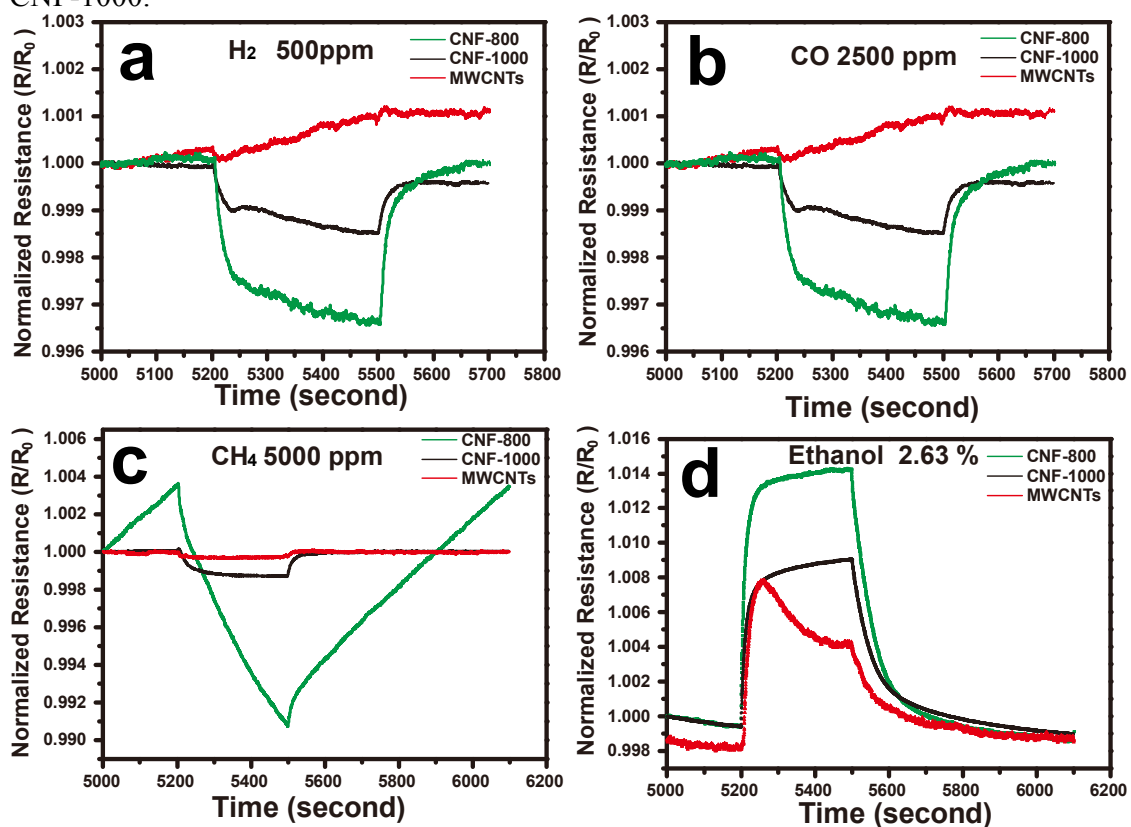

**Fig. S5** The magnified response curves of the sensor based on CNF-800 (green line), CNF-1000 (black line) and commercial MWCNTs (red line) to (a) 500 ppm of  $\text{H}_2$ , (b) 2500 ppm of  $\text{CO}$ , (c) 5000 ppm of  $\text{CH}_4$  and (d) 2.63 vol % of ethanol at room temperature (298 K), respectively.

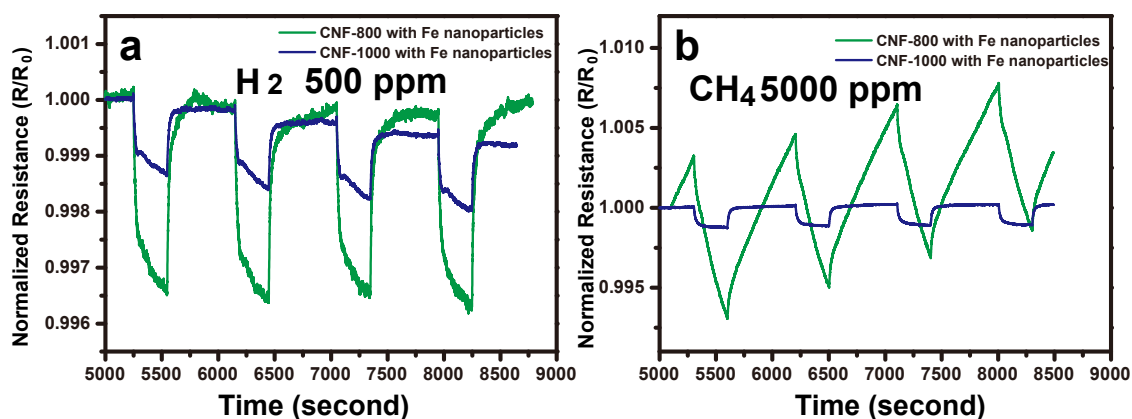

**Fig. S6** The typical response curves of CNF-800 and CNF-1000 samples before removing iron particles to (a) 500 ppm of H<sub>2</sub> and (b) 5000 ppm of CH<sub>4</sub> at 298 K.

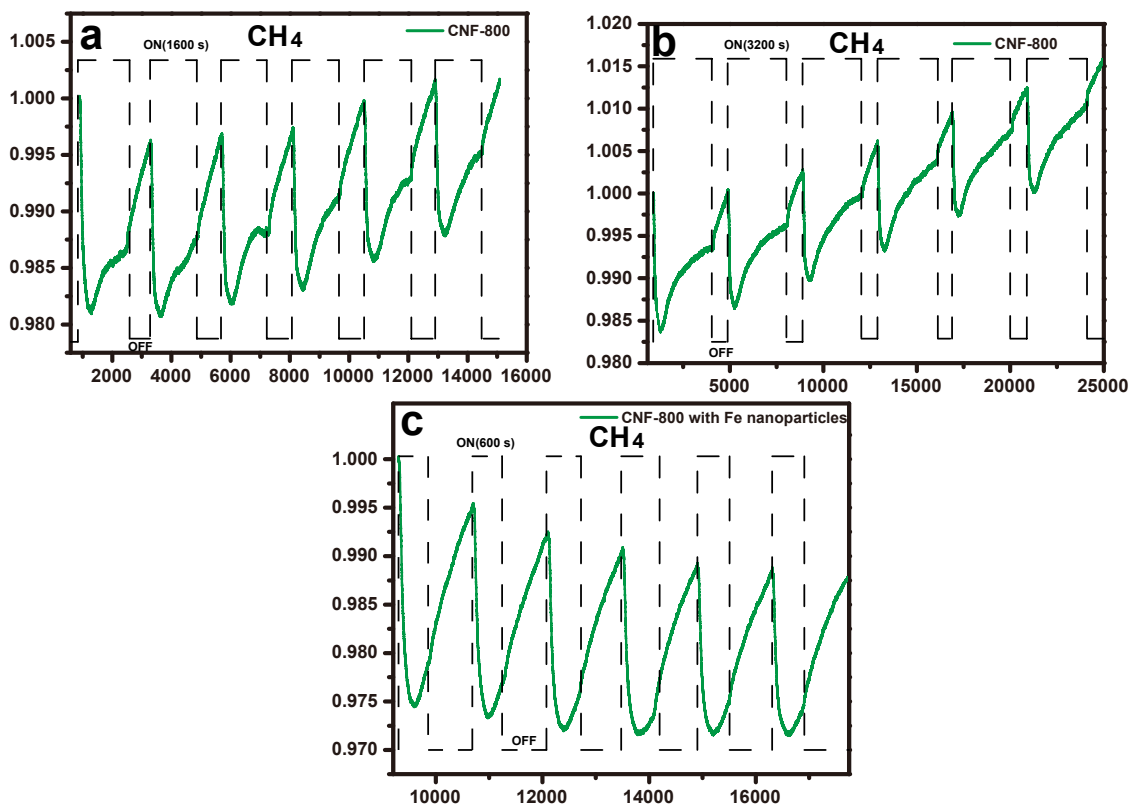

**Fig. S7** (a) The response curve of CNF-800 to 5000 ppm of CH<sub>4</sub> (The CH<sub>4</sub> gas flow keeps on for 1600 s and off for 800 s), (b) the response curve of CNF-800 to 5000 ppm of CH<sub>4</sub> (The CH<sub>4</sub> gas flow keeps on for 3200 s and off for 800 s) and (c) the response curve of CNF-800 samples before removing Fe nanoparticles to 5000 ppm of CH<sub>4</sub> (The CH<sub>4</sub> gas flow keeps on for 600 s and off for 800 s).

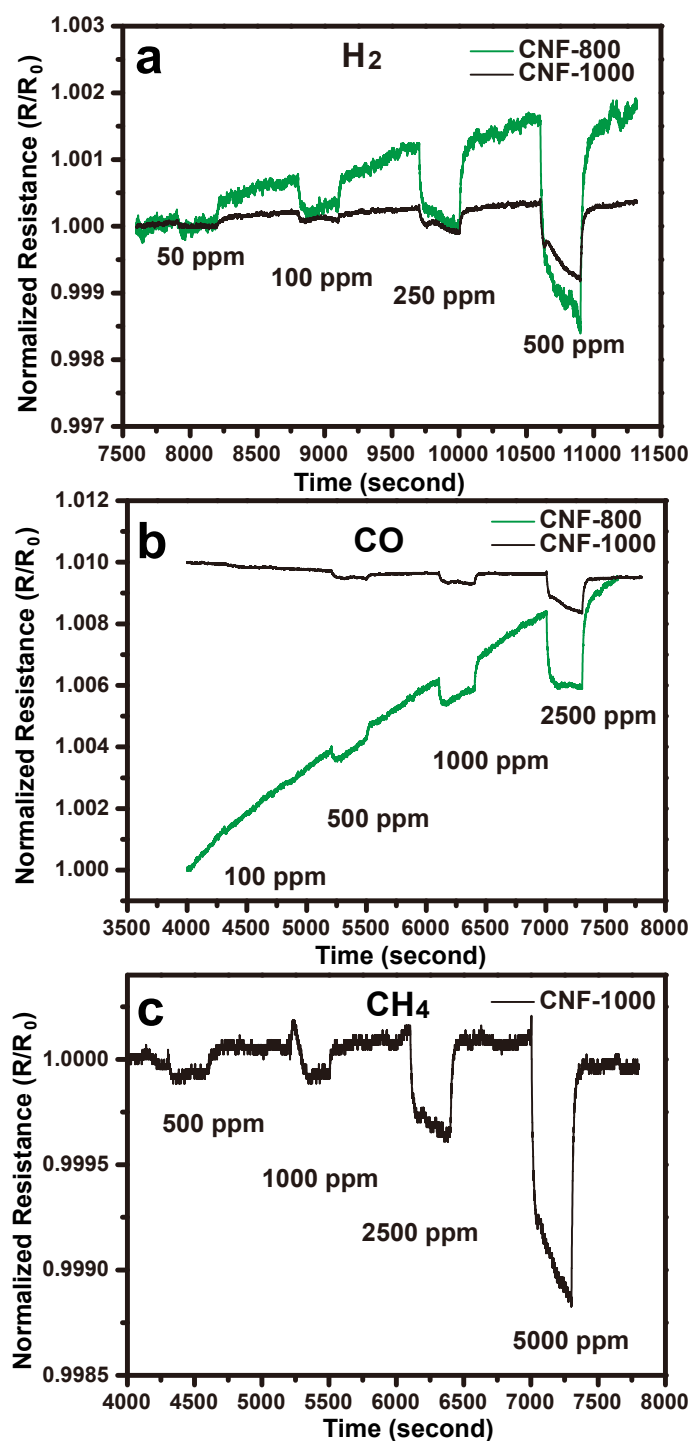

**Fig. S8** a) Typical response curves of CNF-800 and CNF-1000 to  $H_2$  with different concentrations ranging from 50 ppm to 500 ppm, b) Typical response curves of CNF-800 and CNF-1000 to CO with different concentrations ranging from 100 ppm to 2500 ppm, and c) Variation of the response of the sensor based on CNF-1000 to  $CH_4$  with the changing concentration ranging from 500 ppm to 5000 ppm.
